# Supplementary material for: Tumor-infiltrating macrophages express interleukin-25 and predict a favorable prognosis in patients with gastric cancer after radical resection
Source: PubMed Central journal article supplement (PMC4905459; doi:10.18632/oncotarget.7095), 2016-01-31
Supplement: oncotarget-07-11083-s001.pdf [file oncotarget-07-11083-s001.pdf]

## Tumor-infiltrating macrophages express interleukin-25 and predict a favorable prognosis in patients with gastric cancer after radical resection

### Supplementary Materials

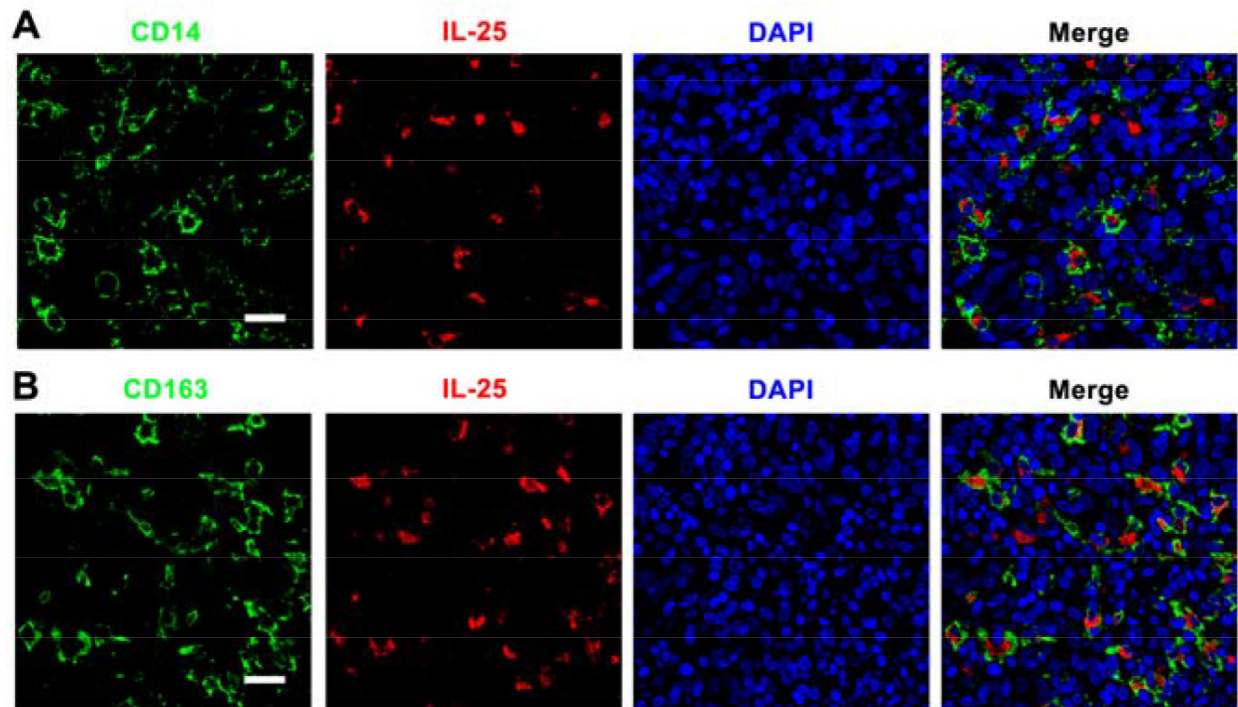

**Supplementary Figure S1: Co-existence of CD14 or CD163 with IL-25 in gastric cancer tissues.** Immunofluorescent staining shows IL-25 (red) with M $\phi$  markers (A) CD14 and (B) CD163 (both green) in the intra-tumoral (IT) region of gastric cancer tissue. DAPI (blue) represents nuclei. Scale bar = 20  $\mu$ m.

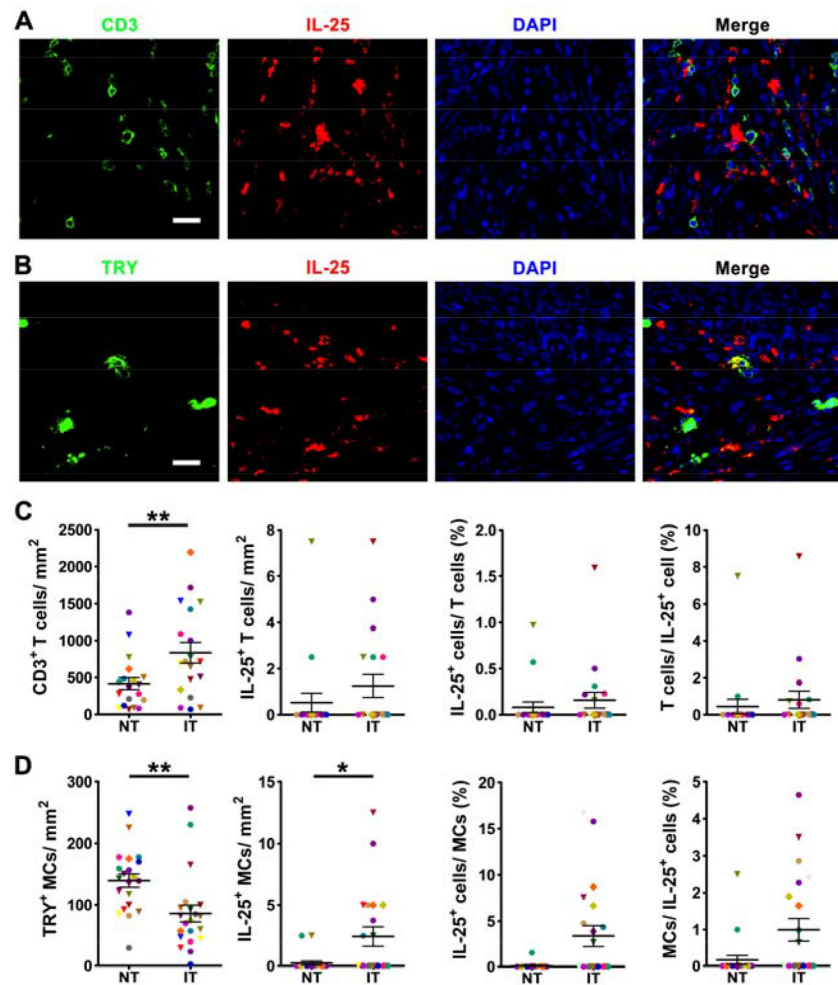

**Supplementary Figure S2: Identification of the cellular sources of IL-25 in gastric cancer tissue.** Double immunofluorescent staining shows IL-25 (red) with T cell marker (A) CD3 or (B) mast cell (MC) marker TRY (both green) in the intra-tumoral region of gastric cancer (GC) tissue. Scale bar = 20  $\mu\text{m}$ . (C) Comparisons between the intra-tumoral (IT) and non-tumoral (NT) regions in GC tissue: (left to right) the densities of CD3<sup>+</sup>T cells and IL-25<sup>+</sup>T cells; and the percentages of double-positive cells relative to total CD3<sup>+</sup> or IL-25<sup>+</sup> cells ( $n = 19$ ). (D) Left to right: the corresponding densities of TRY<sup>+</sup> MCs and IL-25<sup>+</sup> MCs; and the percentages of double-positive cells relative to total TRY<sup>+</sup> or IL-25<sup>+</sup> cells ( $n = 21$ ). Results are expressed as mean  $\pm$  SEM (bars). \* $p < 0.05$ ; \*\* $p < 0.01$ .

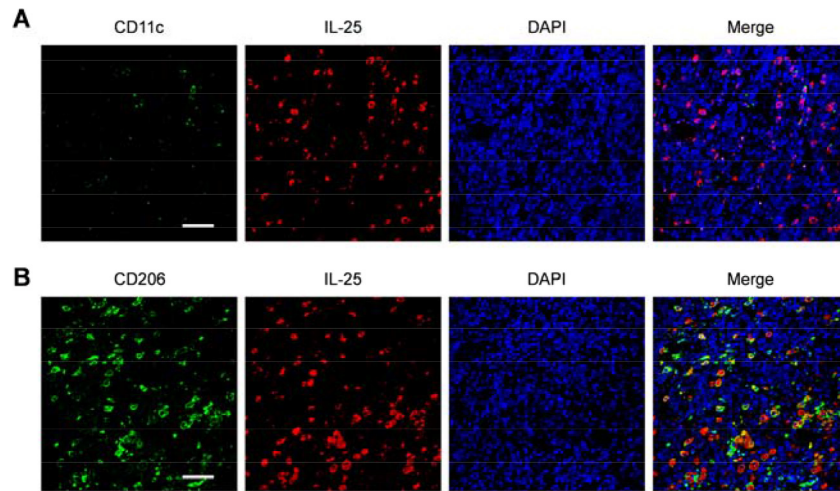

**Supplementary Figure S3: Phenotypical analysis of IL-25<sup>+</sup> Mφs in gastric cancer tissue.** A representative micrograph ( $n = 10$ ) showing double immunofluorescence staining for IL-25 (red) and either (A) CD11c (green) or (B) CD206 (green) in the intra-tumoral region in gastric cancer tissue sections. DAPI (blue) was used as a counterstain. The results were evaluated by confocal microscopy. Scale bar = 50  $\mu\text{m}$ .

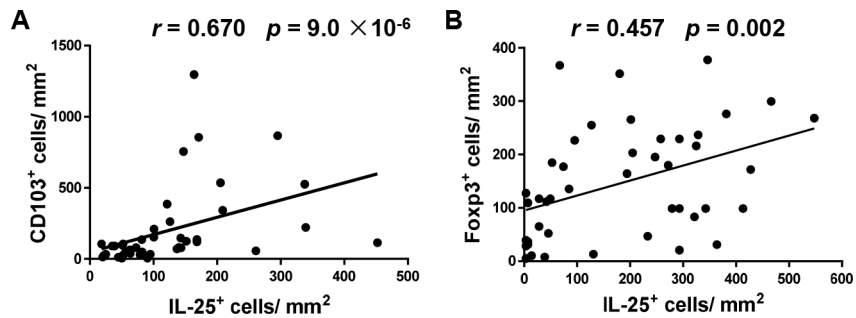

**Supplementary Figure S4: The density of IL-25<sup>+</sup> cells was positively associated with T cell markers in gastric cancer tissue.** Immunohistochemical quantification showing the associations between the densities of IL-25<sup>+</sup> cells and those of other immune cells in the intra-tumoral region of GC tissue: (A) CD103<sup>+</sup> T cells and (B) Foxp3<sup>+</sup> T cells. Correlations were performed by Spearman's rank correlation coefficient test;  $p < 0.05$  was considered statistically significant.

**Supplementary Table S1: Associations between cell densities and clinicopathological characteristics in patients with gastric cancer <sup>a</sup>**

| Variables              | Intra-tumoral IL-25 <sup>+</sup> Mφs |                |                |
|------------------------|--------------------------------------|----------------|----------------|
|                        | Low [No. (%)]                        | High [No. (%)] | <i>p</i> value |
| Age, years             |                                      |                |                |
| ≤ 59                   | 27 (50.9)                            | 26 (49.1)      | 0.846          |
| > 59                   | 26 (49.1)                            | 27 (50.9)      |                |
| Gender                 |                                      |                |                |
| Male                   | 38 (50.0)                            | 38 (50.0)      | 1.000          |
| Female                 | 15 (50.0)                            | 15 (50.0)      |                |
| Borrmann type          |                                      |                |                |
| I + II                 | 27 (56.3)                            | 21 (43.7)      | 0.242          |
| III + IV + other       | 26 (44.8)                            | 32 (55.2)      |                |
| Tumor size, cm         |                                      |                |                |
| ≤ 4                    | 18 (41.9)                            | 25 (58.1)      | 0.191          |
| > 4                    | 34 (54.8)                            | 28 (45.2)      |                |
| Tumor location         |                                      |                |                |
| higher                 | 26 (57.8)                            | 19 (42.2)      | 0.169          |
| middle + lower + other | 27 (44.3)                            | 34 (55.7)      |                |
| Tumor depth            |                                      |                |                |
| pT1 + pT2              | 8 (33.3)                             | 16 (66.7)      | 0.063          |
| pT3 + pT4              | 45 (54.9)                            | 37 (45.1)      |                |
| Lymph node metastasis  |                                      |                |                |
| pN0                    | 19 (51.4)                            | 18 (48.6)      | 0.839          |
| pN1 + pN2 + pN3        | 34 (49.3)                            | 35 (50.7)      |                |
| TNM stage              |                                      |                |                |
| I + II                 | 22 (44.9)                            | 27 (55.1)      | 0.330          |
| III + IV               | 31 (54.4)                            | 26 (45.6)      |                |
| Lauren classification  |                                      |                |                |
| intestinal             | 39 (55.7)                            | 31 (44.3)      | 0.101          |

|                                 |           |           |                   |
|---------------------------------|-----------|-----------|-------------------|
| diffuse + mixed                 | 14 (38.9) | 22 (61.1) |                   |
| Histological grade <sup>b</sup> |           |           |                   |
| I + II                          | 21 (80.8) | 5 (19.2)  | <b>&lt; 0.001</b> |
| III + other                     | 32 (40.0) | 48 (60.0) |                   |

<sup>a</sup> $\chi^2$  test. Significant *p* values (< 0.05) are shown in bold font.

Three non-significant variables are not shown: age, gender, Borrmann type.

<sup>b</sup>Well-differentiated adenocarcinoma (I), moderately differentiated adenocarcinoma (II), poorly differentiated adenocarcinoma (III), other histologic type including signet ring cell and mucinous(other).

Abbreviations: pT, depth of tumor invasion; pN, lymph node metastasis; TNM, tumor-node-metastasis.
